# Supplementary material for: Canagliflozin protects against cisplatin-induced acute kidney injury by AMPK-mediated autophagy in renal proximal tubular cells
Source: PubMed Central journal article supplement (PMC8748642; doi:10.1038/s41420-021-00801-9), 2022-01-10
Supplement: 41420_2021_801_MOESM7_ESM.pdf [file 41420_2021_801_MOESM7_ESM.pdf]

Please complete the table below to indicate the contributions of all named authors to the figures.

Figure 1:

CHP generated and prepared panel A and B.  
CHP and BL generated and prepared panel C–E.  
CHP assembled the figure.

Figure 2:

CHP and BL generated and prepared panel A–D.  
CHP generated and prepared panel E and F.  
CHP and BL generated and prepared panel G.  
CHP assembled the figure.

Figure 3:

CHP generated and prepared panel A–F.  
CHP assembled the figure.

Figure 4:

CHP conducted the animal experiments.  
CHP generated and prepared panel A–C.  
CHP and WJR scored tubular injury indicated in H–E stain result in panel D.  
CHP prepared panel D and E.  
CHP and MGH counted the number of TUNEL positive cells indicated in TUNEL assay of panel F.  
CHP prepared panel F.  
CHP generated and prepared panel G–I.  
CHP and MSK quantified the intensity of LC3B staining on the immunohistochemical staining in panel J.  
CHP prepared panel J.  
CHP generated and prepared panel K and L.  
CHP assembled the figure.

Figure 5:

CHP conducted the animal experiments.  
CHP generated and prepared panel A–C.  
CHP and WJR scored tubular injury indicated in H–E stain result in panel D.  
CHP prepared panel D and E.  
CHP and MGH counted the number of TUNEL positive cells indicated in TUNEL assay of panel F.  
CHP prepared panel F.  
CHP generated and prepared panel G and H.  
CHP assembled the figure.

Figure 6:

CHP conducted the animal experiments.  
CHP generated and prepared panel A–C.  
CHP and WJR scored tubular injury indicated in H–E stain result in panel D.  
CHP prepared panel D and E.  
CHP and MGH counted the number of TUNEL positive cells indicated in TUNEL assay of panel F.  
CHP prepared panel F.  
CHP generated and prepared panel G and H.  
CHP assembled the figure.

Signed for and on behalf of the Author(s):

Print Name:

Date:

*J. S. Shin*

Jeon-Soo Shin

November 23, 2021
